# Supplementary material for: Platelet extracellular vesicles induce a pro-inflammatory smooth muscle cell phenotype
Source: PubMed Central journal article supplement — J Extracell Vesicles. 2017 May 16;6(1):1322454. doi: 10.1080/20013078.2017.1322454 (PMC5505004; doi:10.1080/20013078.2017.1322454), 2017-05-16
Supplement: zjev_a_1322454_sm7826.pdf [file zjev_a_1322454_sm7826.pdf]

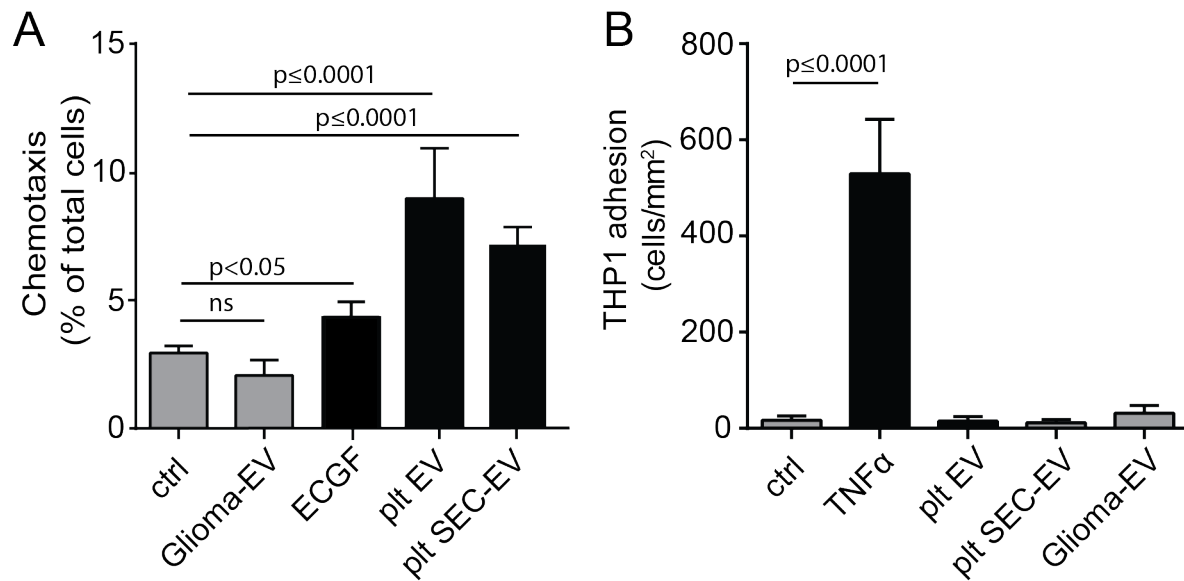

**Supplementary Figure 1: Platelet EV increase migration of HUVEC but do not influence monocytic cell adhesion.**

HUVEC were incubated with platelet EV, SEC-platelet EV, glioma-EV, or TNF $\alpha$  (10ng/mL, 4h). Syto13 fluorescently labelled THP-1 were perfused at 0.15 mL/min (3 dynes/cm<sup>2</sup>) and adherent cells were quantified in 6 different fields (A). HUVEC migration was assessed in a Boyden chamber in the presence of medium (ctrl), Glioma-EV, ECGF (200 $\mu$ g/mL), platelet EV, or SEC-platelet EV (B). P-values were calculated by ANOVA with Sidak's post-test (n=3).
